# Supplementary material for: <em></em><em>Fusarium</em> <em>Culmorum</em> Produces NX-2 Toxin Simultaneously With Deoxynivalenol and 3-Acetyl-Deoxynivalenol or Nivalenol (Submitted to Toxins)
Source: Preprints.org preprint supplement (doi:10.20944/preprints202206.0190.v2), 2022-06-20

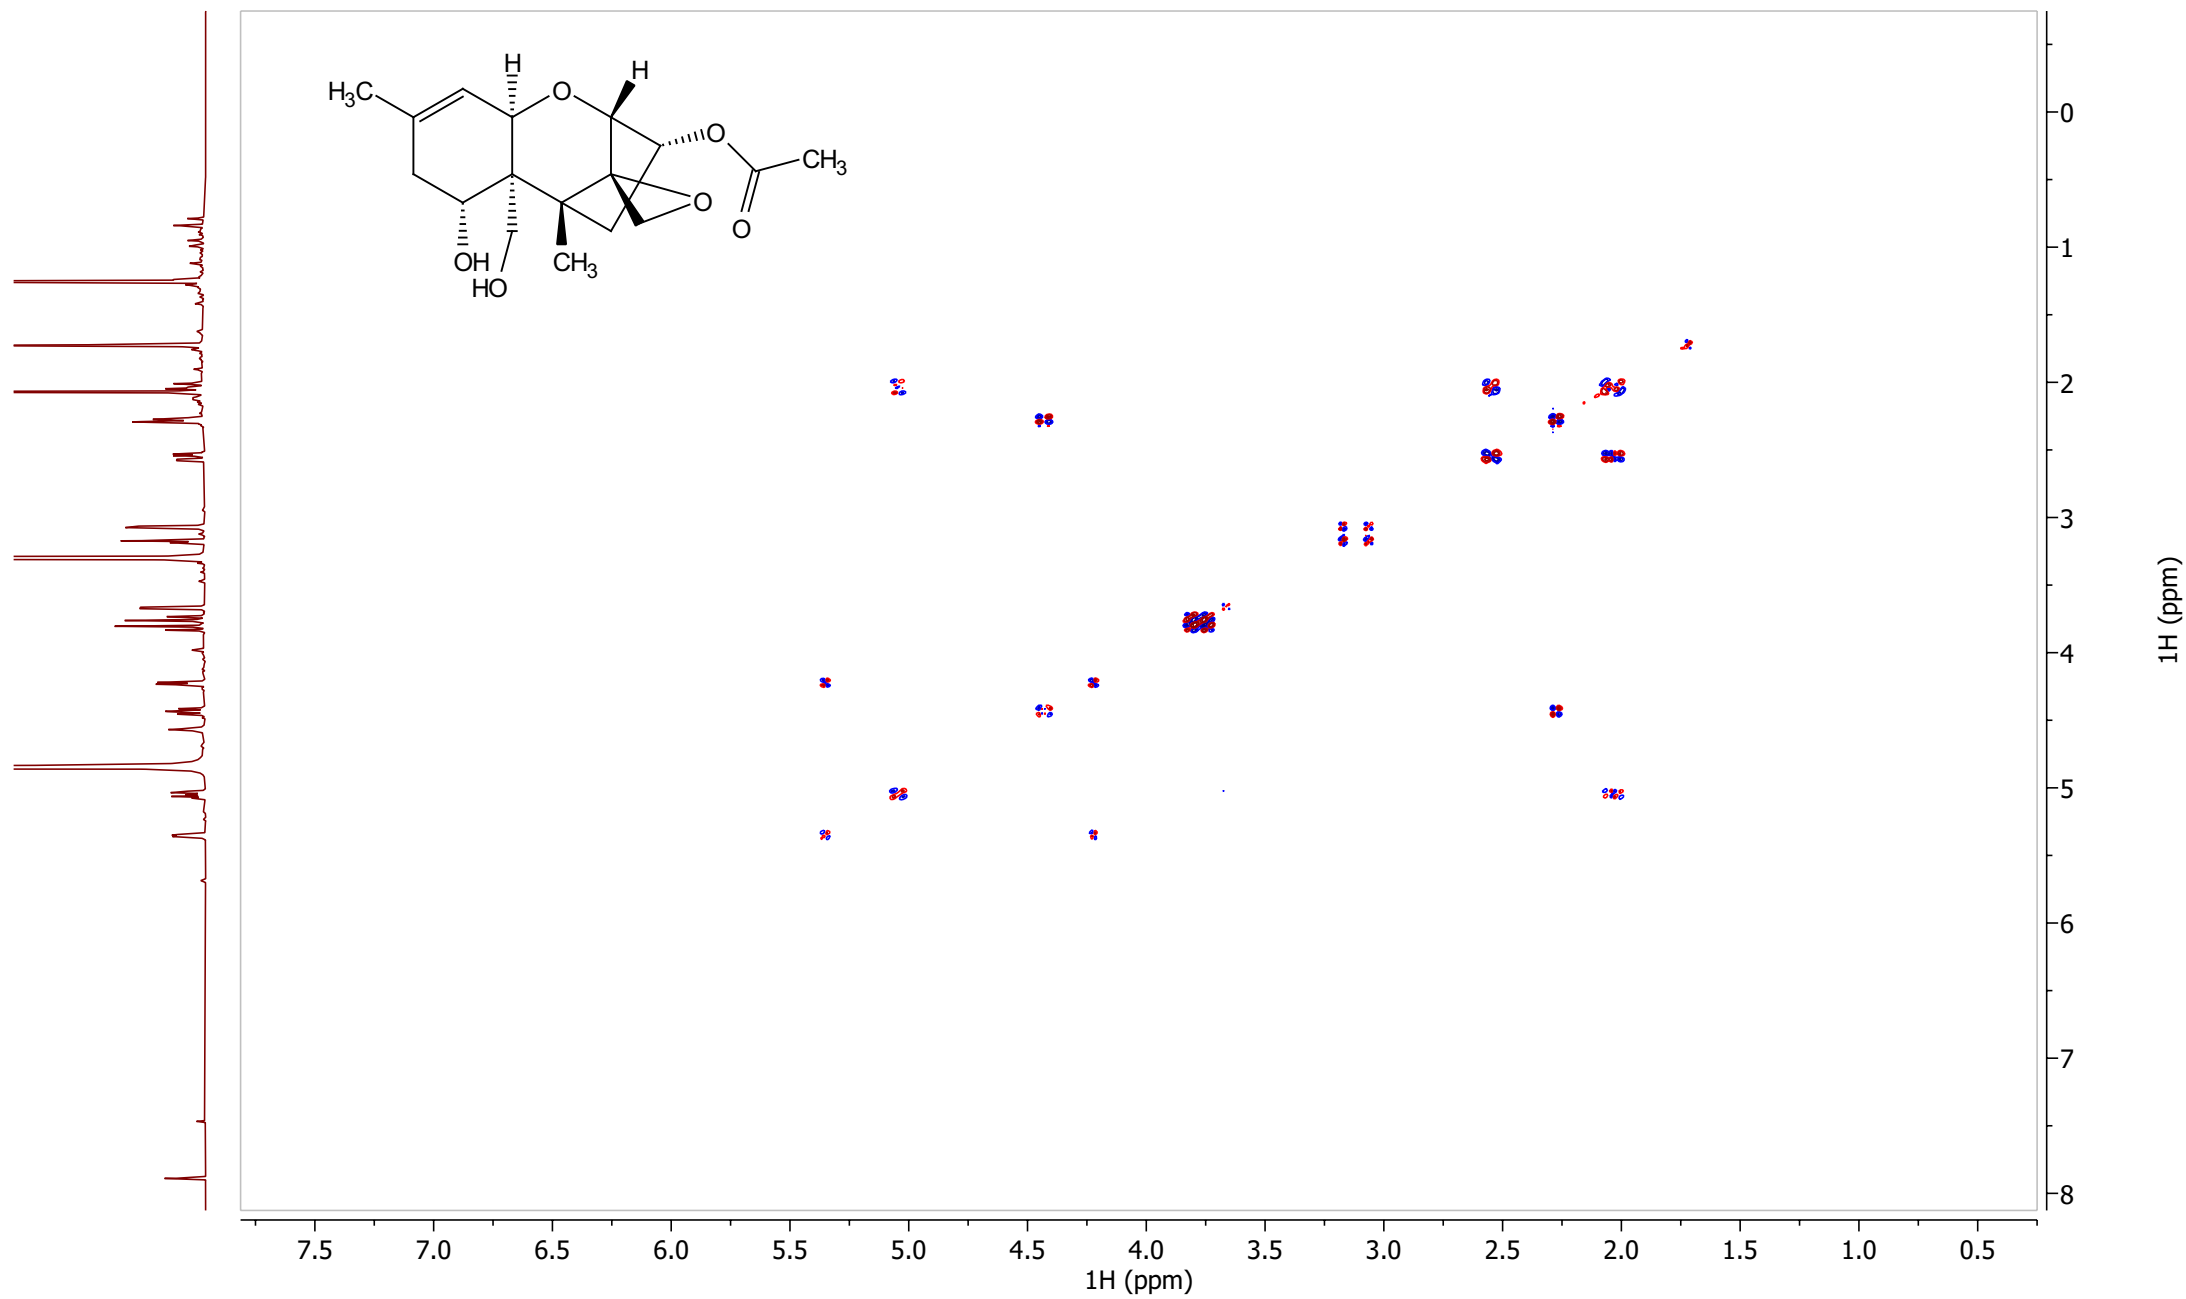

Supplement: Supplementary file [file supplementary]
