# Supplementary material for: <em></em><em>Fusarium</em> <em>Culmorum</em> Produces NX-2 Toxin Simultaneously With Deoxynivalenol and 3-Acetyl-Deoxynivalenol or Nivalenol (Submitted to Toxins)
Source: Preprints.org preprint supplement (doi:10.20944/preprints202206.0190.v2), 2022-06-20
Supplement: Supplementary file [file supplementary]

**Supplementary Table S2.** Conditions used for the amplification of *TRI1* gene of *F. culmorum*

| Forward primer | Reversed primer | Initial denaturation | Denaturation | Annealing   | Elongation   | Terminal elongation | No. of cycles | Length [bp] |
|----------------|-----------------|----------------------|--------------|-------------|--------------|---------------------|---------------|-------------|
| TRI16IF1       | Tri1_5prime_RV  | 95 °C, 30 s          | 94 °C, 30 s  | 59 °C, 30 s | 68 °C, 120 s | 68 °C, 5 min        | 35            | 1641        |
| Tri1_5prime_FW | Tri1_SH_R       | 95 °C, 30 s          | 94 °C, 30 s  | 59 °C, 30 s | 68 °C, 120 s | 68 °C, 5 min        | 35            | 764         |
| Tri1_SH_F      | FgTRI1-R1       | 95 °C, 30 s          | 94 °C, 30 s  | 59 °C, 30 s | 68 °C, 120 s | 68 °C, 5 min        | 35            | 760         |
| FcTri1F        | Tri1R           | 95 °C, 30 s          | 94 °C, 30 s  | 58 °C, 30 s | 68 °C, 140 s | 68 °C, 5 min        | 35            | 1745        |
