# Supplementary material for: <em></em><em>Fusarium</em> <em>Culmorum</em> Produces NX-2 Toxin Simultaneously With Deoxynivalenol and 3-Acetyl-Deoxynivalenol or Nivalenol (Submitted to Toxins)
Source: Preprints.org preprint supplement (doi:10.20944/preprints202206.0190.v2), 2022-06-20
Supplement: Supplementary file [file supplementary]

**Table S2.** Accession numbers of sequences of the *TRI1* gene

| Species                                        | Isolate     | Accession No. |
|------------------------------------------------|-------------|---------------|
| <i>F. culmorum</i>                             | K11.2       | OM144918      |
| <i>F. culmorum</i>                             | J31.2       | OM144919      |
| <i>F. culmorum</i>                             | IPP1000     | OM144920      |
| <i>F. culmorum</i>                             | IPP0999     | OM144921      |
| <i>F. culmorum</i>                             | IPP0619     | OM144922      |
| <i>F. culmorum</i>                             | IPP0618     | OM144923      |
| <i>F. culmorum</i>                             | IPP0213     | OM144924      |
| <i>F. culmorum</i>                             | IPP0212     | OM144925      |
| <i>F. culmorum</i>                             | IPP0211     | OM144926      |
| <i>F. culmorum</i>                             | DSM62188    | OM144927      |
| <i>F. culmorum</i>                             | 969         | OM144928      |
| <i>F. culmorum</i>                             | 966         | OM144929      |
| <i>F. culmorum</i>                             | 59.6st      | OM144930      |
| <i>F. culmorum</i>                             | 55.6st      | OM144931      |
| <i>F. culmorum</i>                             | 31.6st      | OM144932      |
| <i>F. culmorum</i>                             | DSM62184    | OM144933      |
| <i>F. culmorum</i>                             | 3.37        | OM144934      |
| <i>F. culmorum</i>                             | 240.2sp     | OM144935      |
| <i>F. culmorum</i>                             | 227. 2cst   | OM144936      |
| <i>F. culmorum</i>                             | 215.1st     | OM144937      |
| <i>F. graminearum</i>                          | CML3066     | LT222053      |
| <i>F. graminearum</i>                          | 06-267      | KX183401      |
| <i>F. graminearum</i>                          | 38383       | KX183278      |
| <i>F. graminearum</i>                          | 06-204      | KM999943      |
| <i>F. graminearum</i>                          | 02-264      | KM999941      |
| <i>F. graminearum</i>                          | 03-348      | KM999942      |
| <i>F. graminearum</i>                          | 40567       | KX183282      |
| <i>F. graminearum</i>                          | 45380       | KX183296      |
| <i>F. cerealis</i> ( <i>F. crookwellense</i> ) | 25805       | KX183232      |
| <i>F. pseudograminearum</i>                    | 28062       | KX183238      |
| <i>F. langsethiae</i>                          | NRRL53410   | HQ594538      |
| <i>F. sporotrichioides</i>                     | NRRL29977   | HQ594536      |
| <i>F. incarnatum</i>                           | NRRL31160   | GQ915526      |
| <i>F. sambucinum</i>                           | FRC R-07843 | GQ915521      |
| <i>F. poae</i>                                 | FRC T-0962  | GQ915520      |
