# Supplementary material for: <em></em><em>Fusarium</em> <em>Culmorum</em> Produces NX-2 Toxin Simultaneously With Deoxynivalenol and 3-Acetyl-Deoxynivalenol or Nivalenol (Submitted to Toxins)
Source: Preprints.org preprint supplement (doi:10.20944/preprints202206.0190.v2), 2022-06-20
Supplement: Supplementary file [file supplementary]

**Table S1.** Comparison of published NMR spectral data for NX-2 with experimental data obtained on putative NX-2 from rice culture of *F. culmorum* 240.2.

| Position  | Reported by Varga <i>et al.</i> , 2015 |                              | Experimental data  |                              |
|-----------|----------------------------------------|------------------------------|--------------------|------------------------------|
|           | $\delta_C$                             | $\delta_H$ , mult. (J in Hz) | $\delta_C$         | $\delta_H$ , mult. (J in Hz) |
| 2         | 80.3                                   | 3.68 d (4.4)                 | 80.2               | 3.68 d (4.4)                 |
| 3         | 73.1                                   | 5.06 dt (11.4, 4.4)          | 73.0               | 5.06 dt (11.3, 4.4)          |
| 4         | 42.9                                   | 2.56 dd (14.9, 4.4)          | 42.7 <sup>b</sup>  | 2.56 dd (14.9, 4.4)          |
|           |                                        | 2.05 <sup>a</sup> m          |                    | 2.06 – 1.99 m                |
| 5         | 47.2                                   | -                            | 47.0 <sup>b</sup>  | -                            |
| 6         | 48.2                                   | -                            | 48.1               | -                            |
| 7         | 71.0                                   | 4.44 dd (9.0, 7.5)           | 70.8 <sup>b</sup>  | 4.44 dd (9.0, 7.4)           |
| 8         | 40.6                                   | 2.32–2.25 m                  | 40.4 <sup>b</sup>  | 2.32 – 2.25 m                |
| 9         | 140.4                                  |                              | 140.3              | -                            |
| 10        | 120.2                                  | 5.36 <sup>a</sup> m          | 120.1              | 5.36 d (5.4)                 |
| 11        | 72.9                                   | 4.23 d (5.4)                 | 72.7 <sup>b</sup>  | 4.23 d (5.4)                 |
| 12        | 66.2                                   | -                            | 66.1               | -                            |
| 13        | 48.8                                   | 3.19 d (4.3)                 | 48.6 <sup>b</sup>  | 3.18 d (4.4)                 |
|           |                                        | 3.08 d (4.3)                 |                    | 3.08 d (4.4)                 |
| 14        | 16.7                                   | 1.26 s                       | 16.6               | 1.26 s                       |
| 15        | 62.6                                   | 3.83 d (11.5)                | 62.4 <sup>b</sup>  | 3.82 d (11.6)                |
|           |                                        | 3.76 d (11.5)                |                    | 3.76 d (11.6)                |
| 16        | 22.9                                   | 1.74 s                       | 22.7 <sup>b</sup>  | 1.73 s                       |
| 17 (3-Ac) | 172.6                                  | -                            | 172.4 <sup>b</sup> | -                            |
| 18 (3-Ac) | 20.9                                   | 2.08 s                       | 20.8               | 2.08 s                       |

<sup>a</sup> misprint in [Varga et al.: Environ. Microbiol. 2015, 17:2588]; <sup>b</sup> all <sup>13</sup>C peaks are shifted 0.1 ppm upfield and a 0.2 ppm difference comes from rounding the second decimal.
